# Supplementary material for: Synthetic Bacterial Community of Duckweed: A Simple and Stable System to Study Plant-microbe Interactions
Source: PubMed Central journal article supplement (PMC7734406; doi:10.1264/jsme2.me20112), 2020-12-02
Supplement: 35_20112_s1.pdf [file 35_20112_s1.pdf]

**Table S1** List of bacterial strains used to construct synthetic bacterial communities.

| Strain | Family            | Isolation medium               | Closet match in the Blast search<br>(Accession number, percent identity) | Compared<br>length (bp) | Accession<br>number |
|--------|-------------------|--------------------------------|--------------------------------------------------------------------------|-------------------------|---------------------|
| DW014  | Caulobacteraceae  | R2A gellan gum + cycloheximide | <i>Asticcacaulis excentricus</i> CB_48 (NR_114730, 99.92%)               | 1,186                   | LC573430            |
| DW019  | Caulobacteraceae  | R2A agar + cycloheximide       | <i>Asticcacaulis excentricus</i> CB_48 (NR_114730, 99.92%)               | 1,205                   | LC573431            |
| DW145  | Caulobacteraceae  | 1/100 TSB gellan gum           | <i>Asticcacaulis excentricus</i> CB_48 (NR_114730, 98.97%)               | 1,165                   | LC573432            |
| DW039  | Comamonadaceae    | 1/100 R2A agar + cycloheximide | <i>Acidovorax temperans</i> PHL (NR_028715, 99.24%)                      | 1,186                   | LC573433            |
| DW043  | Comamonadaceae    | 1/100 TSB gellan gum           | <i>Curvibacter delicatus</i> 146 (NR_028713, 98.23%)                     | 1,189                   | LC573434            |
| DW081  | Comamonadaceae    | 1/100 TSB gellan gum           | <i>Pseudacidovorax intermedius</i> CC-21 (NR_044241, 99.92%)             | 1,250                   | LC573435            |
| DW100  | Flavobacteriaceae | R2A gellan gum + cycloheximide | <i>Chryseobacterium gambrini</i> 5-1St1a (NR_042505, 99.75%)             | 1,199                   | LC573436            |
| DW157  | Flavobacteriaceae | R2A agar + cycloheximide       | <i>Flavobacterium shanxiense</i> YF-2 (NR_169385, 99.45%)                | 1,266                   | LC573437            |
| DW160  | Flavobacteriaceae | R2A agar + cycloheximide       | <i>Flavobacterium daejeonense</i> GH1-10 (NR_043654, 97.39%)             | 1,263                   | LC573438            |
| DW102  | Methylophilaceae  | 1/100 TSB agar                 | <i>Methylophilus rhizosphaerae</i> CBMB127 (NR_116239, 99.15%)           | 1,287                   | LC573439            |
| DW159  | Methylophilaceae  | R2A agar + cycloheximide       | <i>Methylophilus rhizosphaerae</i> CBMB127 (NR_116239, 99.34%)           | 1,216                   | LC573440            |
| DW155  | Oxalobacteraceae  | 1/100 TSB agar                 | <i>Herbaspirillum seropedicae</i> Z67 (NR_114720, 99.48%)                | 1,161                   | LC573441            |
| DW158  | Oxalobacteraceae  | R2A agar + cycloheximide       | <i>Herbaspirillum aquaticum</i> IEH 4430 (NR_116605, 99.77%)             | 1,278                   | LC573442            |
| DW067  | Sphingomonadaceae | R2A gellan gum + cycloheximide | <i>Novosphingobium bradum</i> STM-24 (NR_153728, 97.76%)                 | 1,203                   | LC573443            |
| DW012  | Sphingomonadaceae | R2A gellan gum + cycloheximide | <i>Sphingomonas wittichii</i> RW1 (NR_074268, 98.39%)                    | 1,241                   | LC573444            |
| DW096  | Sphingomonadaceae | R2A agar + cycloheximide       | <i>Novosphingobium capsulatum</i> NBRC12533 (NR_113591, 99.35%)          | 1,232                   | LC573445            |

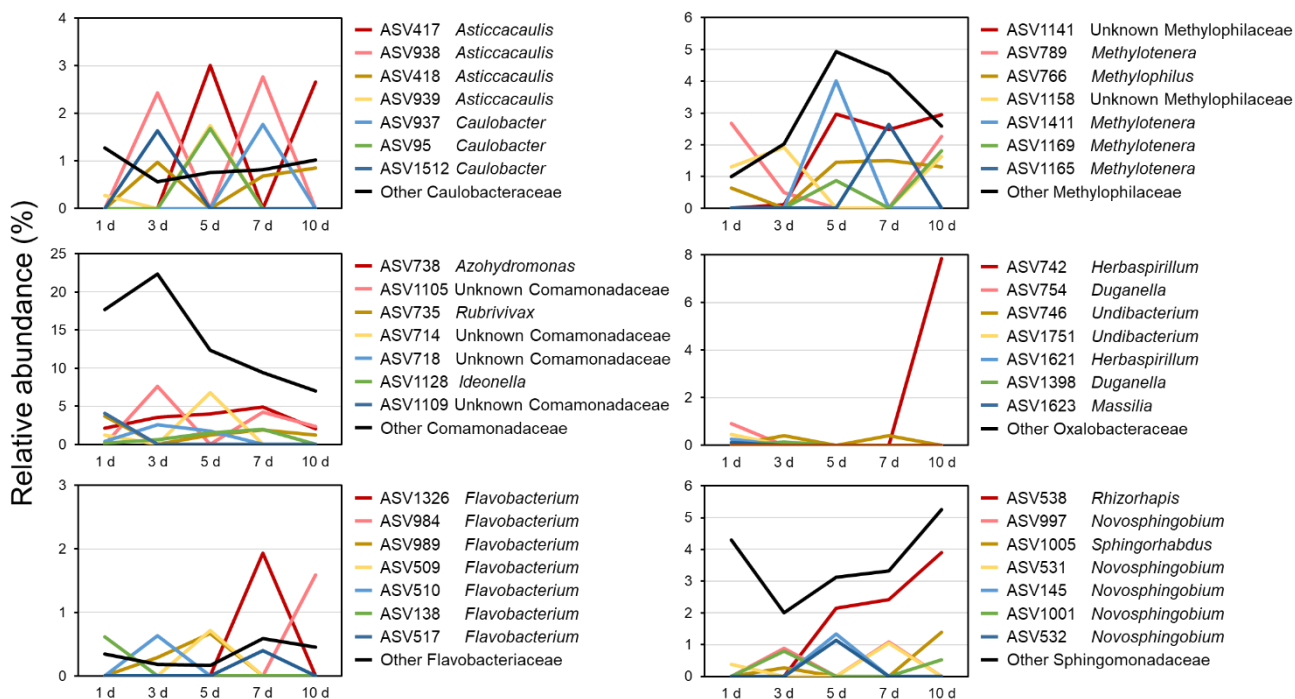

**Fig. S1** Dominant ASVs during the 10-day cultivation in Inukai Pond. Relative abundances of the top seven ASVs in each of the six dominant families are shown. (A) Caulobacteraceae, (B) Comamonadaceae, (C) Flavobacteriaceae, (D) Methylophilaceae, (E) Oxalobacteraceae, (F) Sphingomonadaceae.

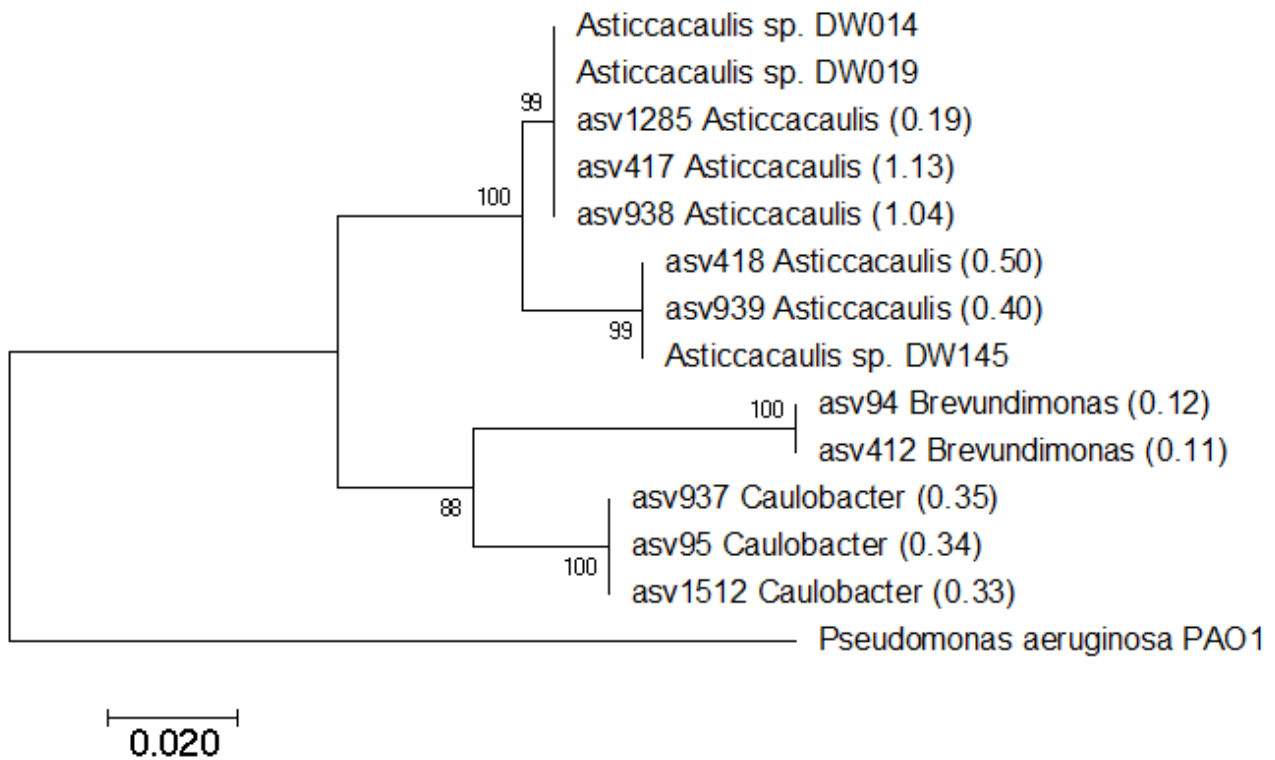

**Fig. S2** Neighbor-joining tree based on partial 16S rRNA gene (255 bp) showing the phylogenetic relationship of strain DW014, DW019 and DW145 among dominant ASVs in Caulobacteraceae (> 0.1%). Values in the parentheses show the mean of relative abundance (%) in the pond-grown duckweed microbiome analyzed after 1, 3, 5, 7, and 10 days. Numbers at nodes indicate percentages of replicate trees in which the associated taxa clustered together in the 1,000 bootstrap test. *Pseudomonas aeruginosa* PAO1 (accession no. DQ777865) was used for the outgroup rooting.

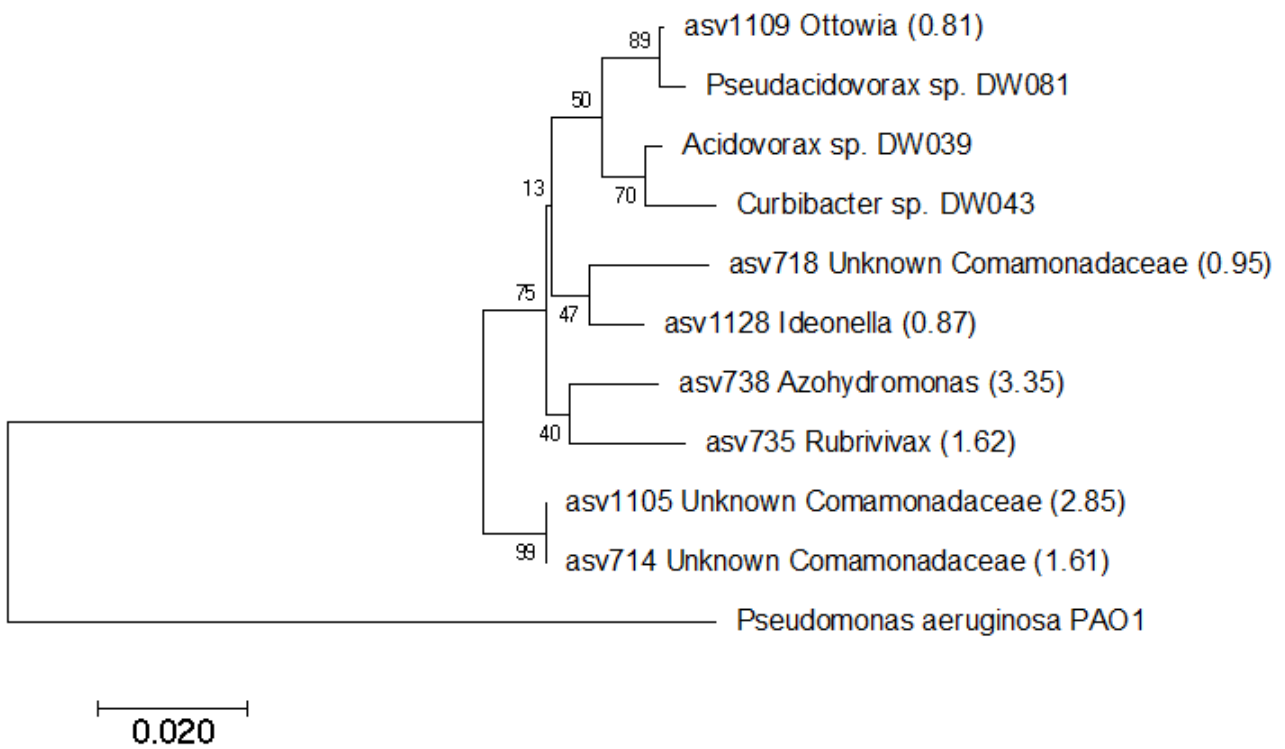

**Fig. S3** Neighbor-joining tree based on partial 16S rRNA gene (258 bp) showing the phylogenetic relationship of strain DW039, DW043 and DW081 among dominant ASVs in Comamonadaceae (> 0.1%). Values in the parentheses show the mean of relative abundance (%) in the pond-grown duckweed microbiome analyzed after 1, 3, 5, 7, and 10 days. Numbers at nodes indicate percentages of replicate trees in which the associated taxa clustered together in the 1,000 bootstrap test. *Pseudomonas aeruginosa* PAO1 (accession no. DQ777865) was used for the outgroup rooting.

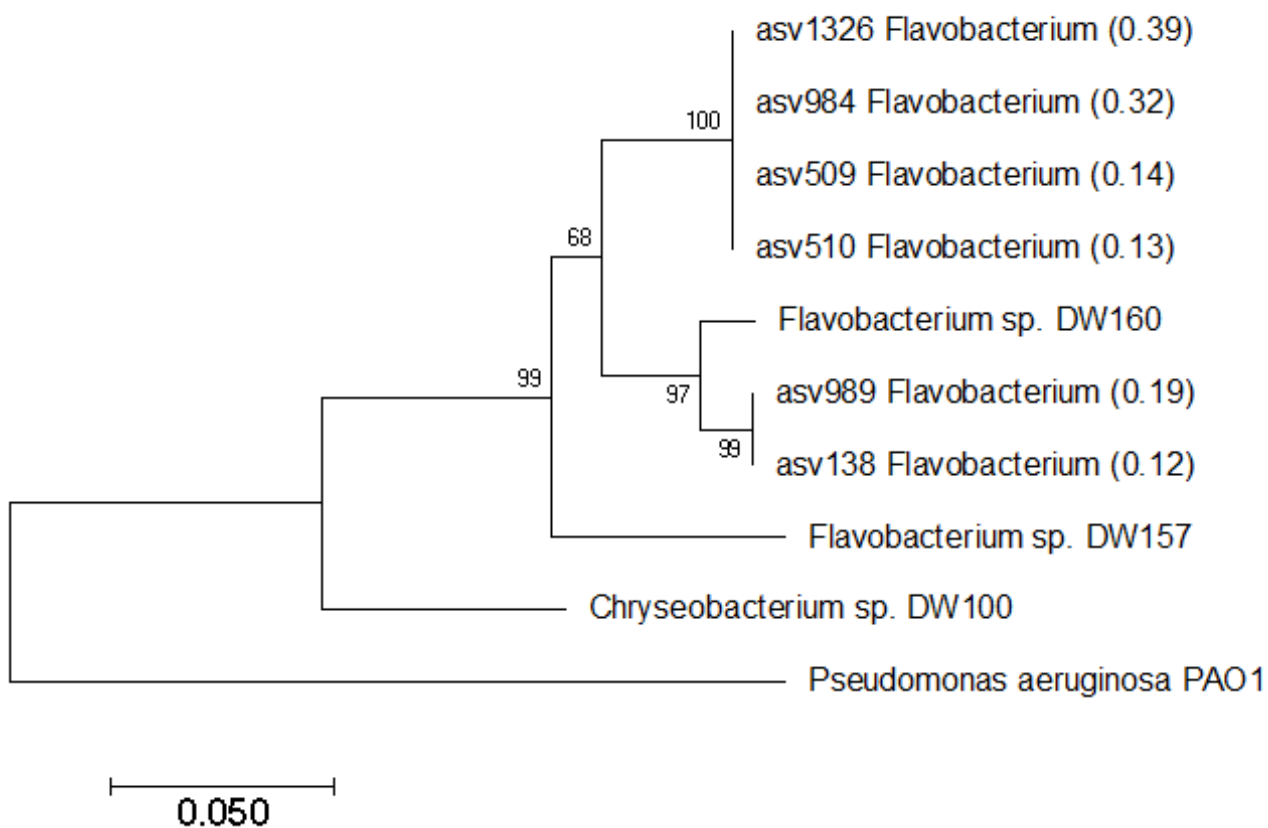

**Fig. S4** Neighbor-joining tree based on partial 16S rRNA gene (255 bp) showing the phylogenetic relationship of strain DW100, DW157 and DW160 among dominant ASVs in Flavobacteriaceae (> 0.1%). Values in the parentheses show the mean of relative abundance (%) in the pond-grown duckweed microbiome analyzed after 1, 3, 5, 7, and 10 days. Numbers at nodes indicate percentages of replicate trees in which the associated taxa clustered together in the 1,000 bootstrap test. *Pseudomonas aeruginosa* PAO1 (accession no. DQ777865) was used for the outgroup rooting.

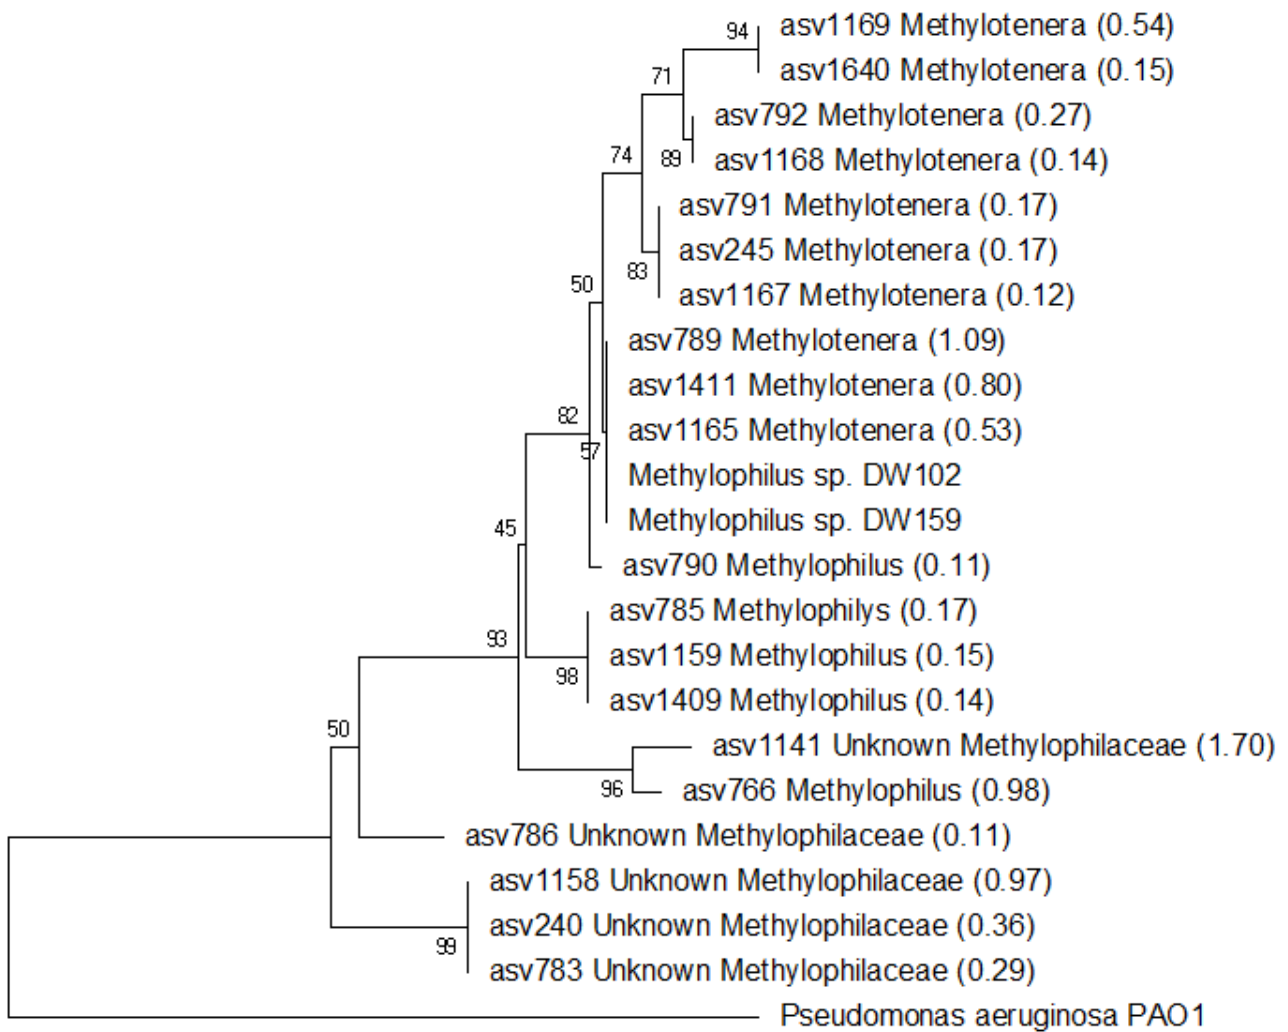

**Fig. S5** Neighbor-joining tree based on partial 16S rRNA gene (256 bp) showing the phylogenetic relationship of strain DW102 and DW159 among dominant ASVs in Methylophilaceae (> 0.1%). Values in the parentheses show the mean of relative abundance (%) in the pond-grown duckweed microbiome analyzed after 1, 3, 5, 7, and 10 days. Numbers at nodes indicate percentages of replicate trees in which the associated taxa clustered together in the 1,000 bootstrap test. *Pseudomonas aeruginosa* PAO1 (accession no. DQ777865) was used for the outgroup rooting.

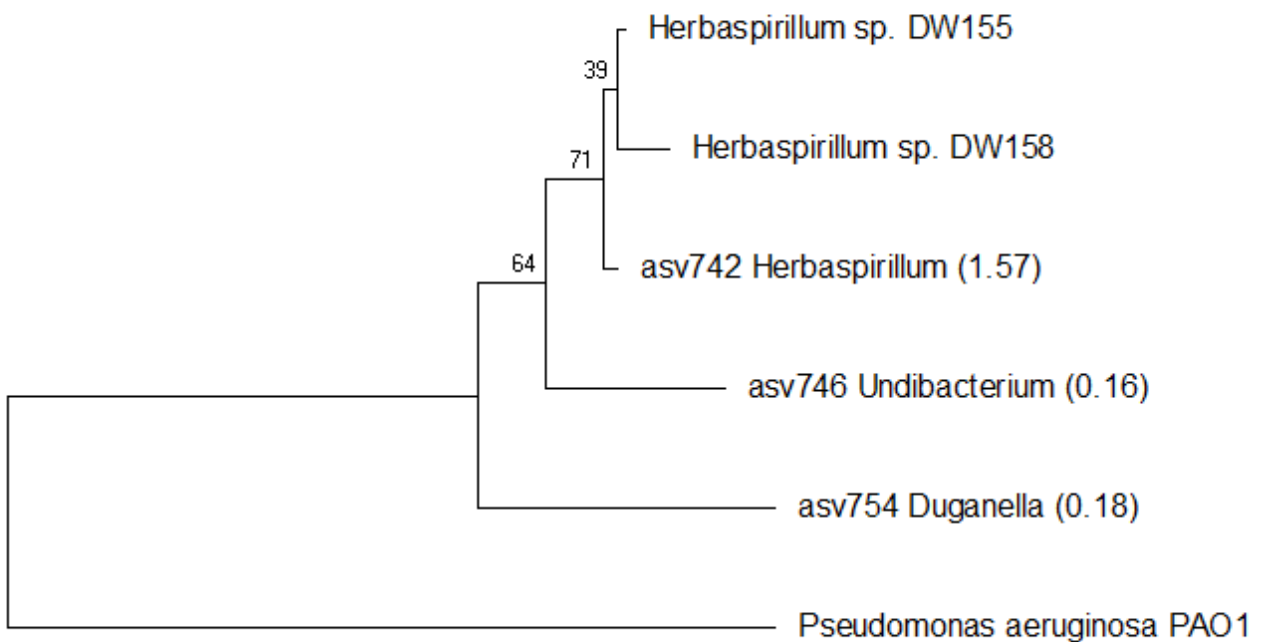

**Fig. S6** Neighbor-joining tree based on partial 16S rRNA gene (260 bp) showing the phylogenetic relationship of strain DW155 and DW158 among dominant ASVs in Oxalobacteraceae (> 0.1%). Values in the parentheses show the mean of relative abundance (%) in the pond-grown duckweed microbiome analyzed after 1, 3, 5, 7, and 10 days. Numbers at nodes indicate percentages of replicate trees in which the associated taxa clustered together in the 1,000 bootstrap test. *Pseudomonas aeruginosa* PAO1 (accession no. DQ777865) was used for the outgroup rooting.

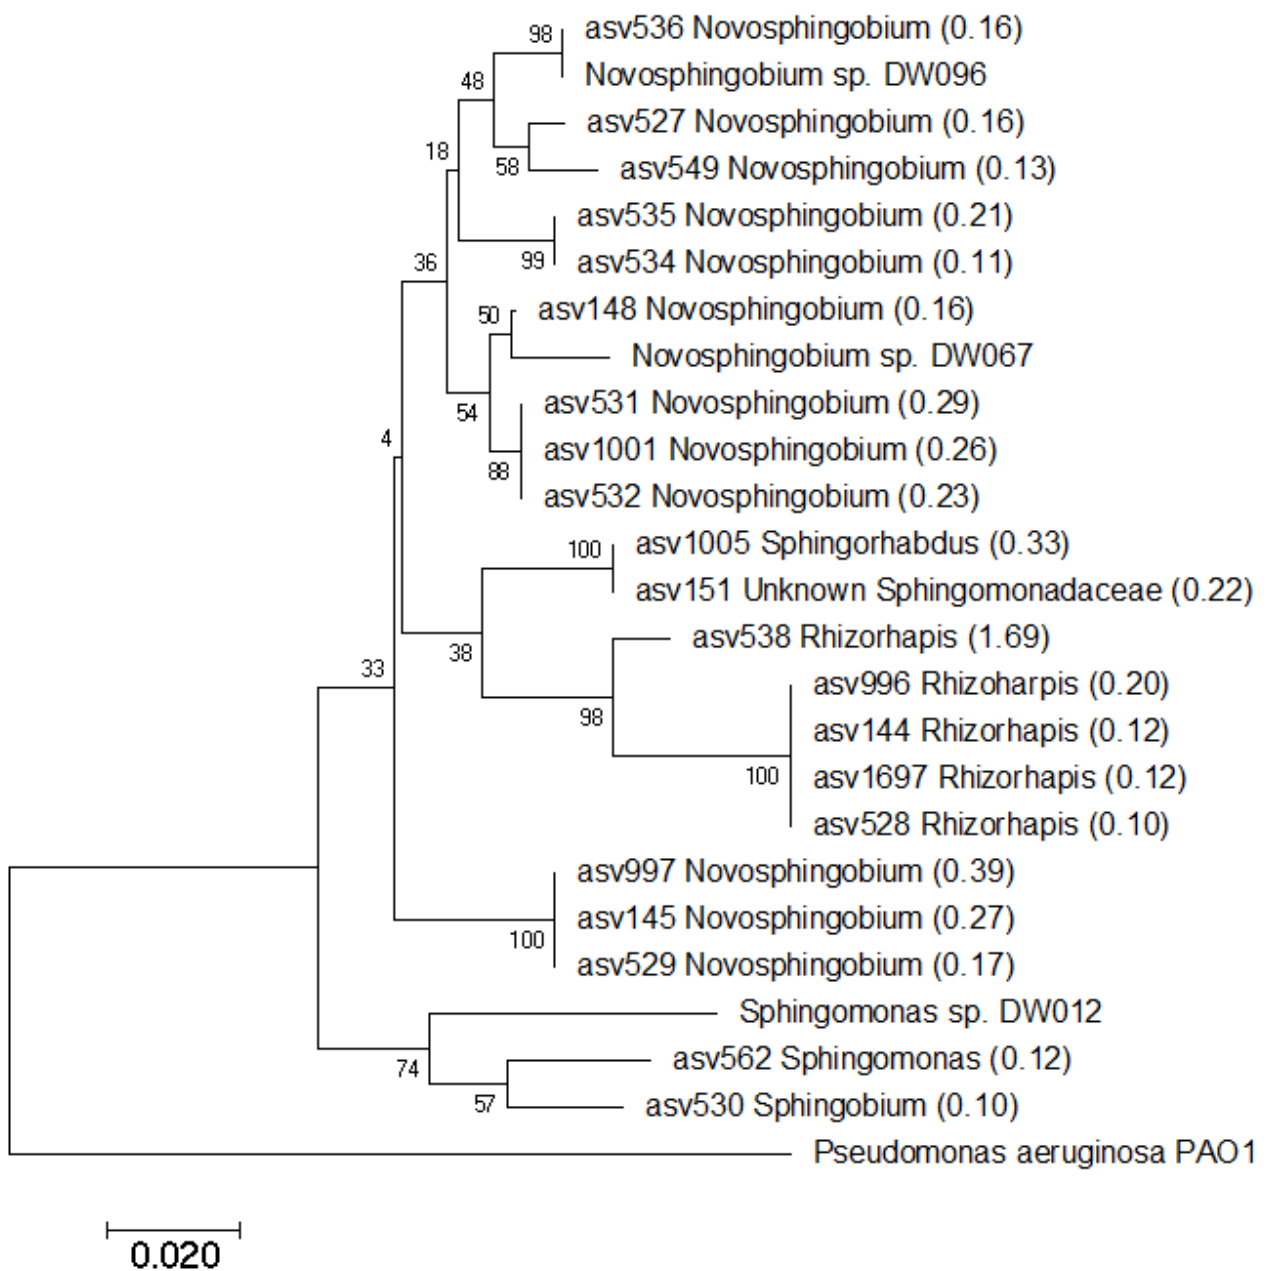

**Fig. S7** Neighbor-joining tree based on partial 16S rRNA gene (257 bp) showing the phylogenetic relationship of strain DW012, DW067 and DW096 among dominant ASVs in *Sphingomonadaceae* (> 0.1%). Values in the parentheses show the mean of relative abundance (%) in the pond-grown duckweed microbiome analyzed after 1, 3, 5, 7, and 10 days. Numbers at nodes indicate percentages of replicate trees in which the associated taxa clustered together in the 1,000 bootstrap test. *Pseudomonas aeruginosa* PAO1 (accession no. DQ777865) was used for the outgroup rooting.
